# Supplementary material
Source: bioRxiv or medRxiv preprint supplement (https://www.medrxiv.org/highwire/filestream/97166/field_highwire_adjunct_files/0/2020.09.15.20195222-1.pdf)
Supplement: Supplementary file [file 2020.09.15.20195222-1.pdf]

## **Supplementary Appendix**

- 2 This technical appendix has been provided by the authors to give readers additional
- 3 information about their work.
  
- 4 Supplement to: Aiken ARA, Starling JE, Gomperts R, Scott JG, Aiken CE.
  
- 5 Demand for Self-Managed Online Telemedicine Abortion in Eight European Countries
  
- 6 During the COVID-19 Pandemic: A Regression Discontinuity Analysis

7

**Table of Contents**

8 **Introduction**..... 4

9 **Study Design and Methods** ..... 4

10 **Results**..... 6

11 **Figure S1** ..... 7

12 **References**..... 8

13

14

## 15 **Introduction**

16 The first wave of the COVID-19 pandemic posed challenges for the provision of abortion  
17 care in Europe. Reallocation of resources, redeployment of staff, and social distancing  
18 requirements all introduced new barriers to in-person clinic visits.<sup>1,2</sup>

19 Countries differed in their policy responses to these new challenges. Great Britain expanded  
20 remote access to medication abortion, allowing teleconsultation with providers, and  
21 mifepristone and misoprostol to be provided by mail.<sup>3-5</sup> France extended the ability to take  
22 abortion medications at home following an in-person visit with a healthcare professional  
23 from 7 weeks to 9 weeks of gestation.<sup>6</sup> Germany allowed mandatory pre-abortion  
24 counselling to take place by phone or video teleconsult instead of in person.<sup>7</sup> Most other  
25 countries, however, made few changes to medication abortion service models and continued  
26 to require fully in-person provision, despite calls from human rights groups to prioritize  
27 patient safety and expand remote access.<sup>7,8</sup>

28 We assessed whether demand for online medication abortion changed significantly in ten  
29 countries after implementation of stay-at-home orders intended to reduce the spread of  
30 COVID-19 in Europe, using online medication abortion request data from Women on Web,  
31 a non-profit organisation that provides telemedicine medication abortion services up to 10  
32 weeks of gestation.<sup>9</sup>

## 33 **Study Design and Methods**

34 We examined data from Women on Web, a non-profit organization that provides medical  
35 abortion services in Europe up to 10 weeks' gestation via online telemedicine.<sup>9</sup> We obtained  
36 the daily number of requests from ten countries between January 1<sup>st</sup>, 2019 and June 1<sup>st</sup>, 2020

37 (the last day that lockdown measures were lifted in a country included in the analysis). Our  
38 analytic sample includes eight countries: Germany, Hungary, Italy, Malta, The Netherlands,  
39 Northern Ireland, Portugal, and Great Britain. WoW does not accept consultations from all  
40 countries in Europe, because abortion is legal and normally relatively accessible in most  
41 places. Among those countries that WoW does serve, some have only a few consultations  
42 requests over the course of a year. We excluded countries that had too few requests to  
43 reliably detect differences in request numbers between the ‘before’ and ‘after’ periods (i.e.  
44 fewer than 10 expected requests in the ‘after’ period). We also excluded Spain, because the  
45 Spanish Government censored the WoW website during the study period and so no requests  
46 could be made,<sup>10</sup> and Poland because the number of requests made to WoW has been  
47 unstable since the beginning of 2020.

48 We analyzed trends in these requests using a regression-discontinuity design.<sup>11</sup> For each  
49 country, we include data from 1<sup>st</sup> January 2019 to the date that lockdown measures were  
50 lifted in each country. We designated a ‘before’ period, which began on 1<sup>st</sup> January 2019  
51 and ended on the date that each individual country’s government issued their first ‘stay-at-  
52 home’ directive. The one exception was Germany, where the ‘before’ period begins on 1<sup>st</sup>  
53 January 2020, due to the fact that WoW did not accept consultations from Germany in until  
54 late 2019. The ‘after’ period began the first day after the ‘stay-at-home’ directive was issued  
55 for each country, and ended on the first day that the directives were eased in each country.  
56 We incorporate a discontinuity for each country for the dates on which stay-at-home orders  
57 were in place. To allow sufficient power to detect differences, our analysis included only  
58 countries that had at least 10 total expected requests in the “before” period based on  
59 baseline trends. As only Malta did not issue a population-wide directive, we instead used the

60 date that the Maltese government issued a directive to close public places as the discontinuity  
61 point.<sup>12</sup>

62 Our aim was to test whether the rate of Women on Web requests significantly changed in  
63 the “after” period. We fit separate generalized linear models (GLMs) to each country’s daily  
64 requests from the beginning of the “before” period until the date stay-at-home measures  
65 were lifted. Each country’s model incorporated a dummy variable taking the value of 1 for  
66 days in the “after” period, where the stay-at-home order was in place. For Northern Ireland,  
67 both the null and discontinuity models included a dummy variable indicating the period after  
68 11<sup>th</sup> April 2020, when Northern Ireland’s service model changed due to legalization of  
69 abortion.<sup>13</sup>

70 To determine the functional form of each country’s GLM, we first fit a Poisson model with  
71 a log link and assessed goodness of fit using a chi-squared test. For any countries with a poor  
72 Poisson model fit ( $p < 0.05$ ), we refit a Negative Binomial GLM to account for over-  
73 dispersion and reassessed fit. This resulted in well-fitting models ( $p \geq 0.05$ ) for all countries.  
74 For a single country, our Poisson GLM can be formalized as

$$75 \quad \log(cases_t) = t + x_t + \epsilon_t, \quad \epsilon_t \sim N(0, \sigma^2) \quad (1)$$

76 while the corresponding null model is written as

$$77 \quad \log(cases_t) = t + \epsilon_t, \quad \epsilon_t \sim N(0, \sigma^2) \quad (2)$$

78 where  $t$  represents days,  $cases_t$  is the number of Women on Web requests on day  $t$ , and  
79 and  $x_t$  takes values of 0 or 1, depending on whether stay-at-home restrictions for that  
80 country are in place on day  $t$ .

81

82 We include an additional term in the models for Northern Ireland due to the change in  
83 abortion legalization. The Poisson GLM model for Northern Ireland can be formalized as

$$84 \quad \log(\text{cases}_t) = t + x_t + z_t + \epsilon_t, \quad \epsilon_t \sim N(0, \sigma^2) \quad (3)$$

85 where  $z_t$  takes values of 0 or 1, depending on whether day  $t$  falls before 11<sup>th</sup> April, 2020.

86 The corresponding null model is

$$87 \quad \log(\text{cases}_t) = t + z_t + \epsilon_t, \quad \epsilon_t \sim N(0, \sigma^2). \quad (4)$$

## 88 **Results**

89 We refer readers to Figure 1 and Table 1 in the main paper for presentation of our main  
90 results. Here, we provide a supplementary figure to illustrate our methods. Figure S1 lends  
91 intuition to the regression discontinuity model for a single country, and illustrates Hungary's  
92 significant increase in cumulative WoW requests after implementation of the stay-at-home  
93 request, compared to the expected number requests under the null model.

94

95

96

97

98

99

100

101 **Figure S1**

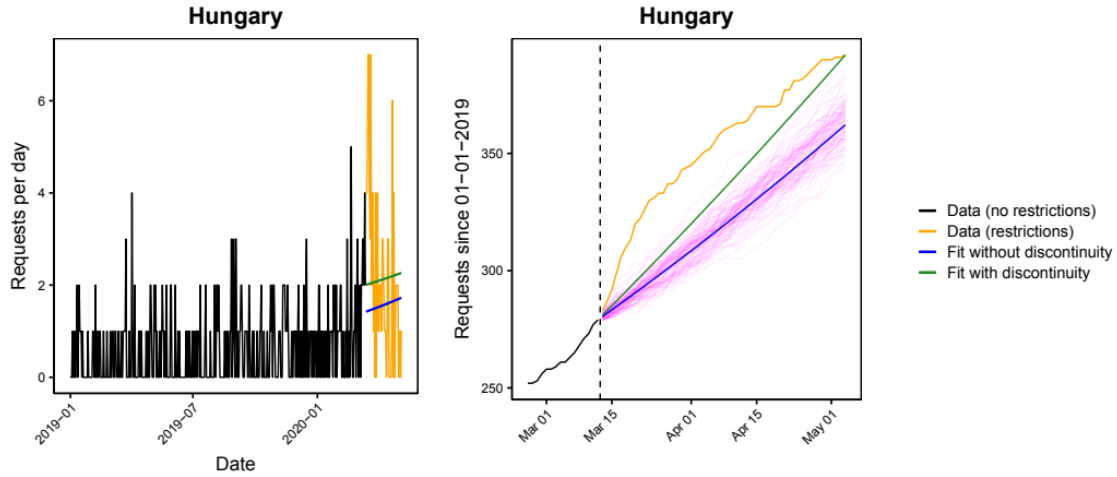

102 Left panel: The daily number of requests for Hungary since January 1, 2019. Requests on  
103 dates without stay-at-home restrictions are black; requests on dates with restrictions are  
104 orange. The blue line shows the model fit without discontinuities (the null model), and the  
105 green line shows the model fit with the stay-at-home discontinuity. Right panel: The same  
106 data, shown in terms of cumulative requests since 1<sup>st</sup> January, 2019. The pink lines are 250  
107 Monte Carlo simulations from the null model. These corroborate the likelihood-ratio test  
108 and suggest the observed rate of requests in Hungary is inconsistent with the null model.  
109 The model with a discontinuity fits the data well, as measured by a chi-squared goodness-of-  
110 fit test ( $p > 0.05$ ).

111

112 **References**

113

114 1. Council on Foreign Relations. Women Around the World & Women and Foreign Policy

115 Program. Abortion in the Time of COVID-19. June 25<sup>th</sup> 2020.

116 <https://www.cfr.org/blog/abortion-time-covid-19> (Accessed September 4th 2020).

117

118 2. European Parliamentary Forum for Sexual and Reproductive Rights & International

119 Planned Parenthood Federation Report. April 22<sup>nd</sup> 2020. Women and girls left without care:

120 a snapshot in time during COVID-19. <https://www.epfweb.org/sites/default/files/2020->

121 [05/epf\\_-\\_ipff\\_en\\_joint\\_report\\_sexual\\_and\\_reproductive\\_health\\_during\\_the\\_covid-](https://www.epfweb.org/sites/default/files/2020-05/epf_-_ipff_en_joint_report_sexual_and_reproductive_health_during_the_covid-)

122 [19\\_pandemic\\_23.04.2020.pdf](https://www.epfweb.org/sites/default/files/2020-05/epf_-_ipff_en_joint_report_sexual_and_reproductive_health_during_the_covid-19_pandemic_23.04.2020.pdf) (Accessed September 4th 2020).

123

124 3. Department of Health and Social Care. Temporary approval of home use for both stages

125 of early medical abortion in England. March 30<sup>th</sup> 2020.

126 <https://www.gov.uk/government/publications/temporary-approval-of-home-use-for-both->

127 [stages-of-early-medical-abortion--2](https://www.gov.uk/government/publications/temporary-approval-of-home-use-for-both-stages-of-early-medical-abortion--2) (Accessed September 4th 2020).

128

129 4. Department of Health and Social Services. Temporary approval of home use for both

130 stages of early medical abortion in Wales.

131 April 1<sup>st</sup> 2020. <https://gov.wales/temporary-approval-home-use-both-stages-early-medical->

132 [abortion](https://gov.wales/temporary-approval-home-use-both-stages-early-medical-abortion)

133 (Accessed September 4<sup>th</sup> 2002).

134



- 135 5. Scottish Government Chief Medical Officer Directorate. Temporary approval of home  
136 use for both stages of early medical abortion in Scotland. March 31<sup>st</sup> 2020.  
137 [https://www.sehd.scot.nhs.uk/cmo/CMO\(2020\)09.pdf](https://www.sehd.scot.nhs.uk/cmo/CMO(2020)09.pdf) (Accessed September 4th 2020).  
138
- 139 6. Haute Autorité de Santé. Réponses rapides dans le cadre du COVID-19 - Interruption  
140 Volontaire de Grossesse (IVG) médicamenteuse à la 8ème et à la 9ème semaine  
141 d'aménorrhée (SA) hors milieu hospitalier  
142 9<sup>th</sup> April 2020. [https://www.has-sante.fr/upload/docs/application/pdf/2020-](https://www.has-sante.fr/upload/docs/application/pdf/2020-04/reponse_rapide_ivg_09_04_2020_coiv8.pdf)  
143 [04/reponse\\_rapide\\_ivg\\_09\\_04\\_2020\\_coiv8.pdf](https://www.has-sante.fr/upload/docs/application/pdf/2020-04/reponse_rapide_ivg_09_04_2020_coiv8.pdf) (Accessed September 4th 2020).  
144
- 145 7. Webber M. How coronavirus is changing access to abortion. *Politico*. May 8<sup>th</sup> 2020.  
146 [https://www.politico.eu/article/how-coronavirus-is-changing-access-to-reproductive-](https://www.politico.eu/article/how-coronavirus-is-changing-access-to-reproductive-health/)  
147 [health/](https://www.politico.eu/article/how-coronavirus-is-changing-access-to-reproductive-health/)  
148 (Accessed September 4th 2020).  
149
- 150 8. Center for Reproductive Rights. European governments must ensure safe and timely  
151 access to abortion care during the COVID-19 pandemic.  
152 [https://reproductiverights.org/press-room/european-governments-must-ensure-safe-and-](https://reproductiverights.org/press-room/european-governments-must-ensure-safe-and-timely-access-abortion-care-during-covid-19)  
153 [timely-access-abortion-care-during-covid-19](https://reproductiverights.org/press-room/european-governments-must-ensure-safe-and-timely-access-abortion-care-during-covid-19) (Accessed September 4th 2020).  
154
- 155 9. Women on Web <https://www.womenonweb.org/en/page/521/about-women-on-web>  
156 (Accessed September 4th 2020).  
157
- 158 10. Women on Web. Spain censors information about abortion amid Covid-19 lockdown.

159 June 17<sup>th</sup> 2020. <https://www.womenonweb.org/en/page/20230/spain-censors-information->  
160 [about-abortion-amid-covid-19-lockdown](https://www.womenonweb.org/en/page/20230/spain-censors-information-about-abortion-amid-covid-19-lockdown). (Accessed September 4th 2020).  
161  
162 11. Venkataramani AS, Bor J, Jena AB. Regression discontinuity designs in healthcare  
163 research. *BMJ*. 2016 Mar 14;352:i1216.  
164  
165 12. Azzopardi K. Covid-19 regulations repealed, vulnerable people no longer required to stay  
166 at home. *Malta Independent*. June 4<sup>th</sup> 2020. [https://www.independent.com.mt/articles/2020-](https://www.independent.com.mt/articles/2020-06-04/local-news/Covid-19-regulations-repealed-vulnerable-people-no-longer-required-to-stay-at-home-6736223847)  
167 [06-04/local-news/Covid-19-regulations-repealed-vulnerable-people-no-longer-required-to-](https://www.independent.com.mt/articles/2020-06-04/local-news/Covid-19-regulations-repealed-vulnerable-people-no-longer-required-to-stay-at-home-6736223847)  
168 [stay-at-home-6736223847](https://www.independent.com.mt/articles/2020-06-04/local-news/Covid-19-regulations-repealed-vulnerable-people-no-longer-required-to-stay-at-home-6736223847) (Accessed September 4th 2020).  
169  
170 13. Ferguson A. Northern Ireland authorities give green light to abortion services. *Reuters*.  
171 April 9<sup>th</sup> 2020. [https://www.reuters.com/article/us-britain-nireland-abortion/northern-](https://www.reuters.com/article/us-britain-nireland-abortion/northern-ireland-authorities-give-green-light-to-abortion-services-idUSKCN21R2XG)  
172 [ireland-authorities-give-green-light-to-abortion-services-idUSKCN21R2XG](https://www.reuters.com/article/us-britain-nireland-abortion/northern-ireland-authorities-give-green-light-to-abortion-services-idUSKCN21R2XG) (Accessed  
173 September 4th 2020).
